# Supplementary material
Source: HighWire-hosted journal article supplement (https://bmjopen.bmj.com/content/7/9/e017528)
Supplement: inline-supplementary-material-2 [file inline-supplementary-material-2.pdf]

## Supplementary 2. Pre-Intervention interview schedule for GP staff

### Staff interview schedule V3 11 02 13

#### Interview information (to be read by interviewer)

We are consulting with primary care practice staff to get their opinions on a multifaceted intervention to increase chlamydia screening and other sexual health work in primary care practices. The interviews will explore staff personal attitudes and the attitudes of the surgery as a whole to offering chlamydia testing/a broader sexual health offer and the feasibility of routinely offering a broader sexual health offer.

We wish to record the interviews to enable us to analyse full and accurate transcripts of what was said – the data will be anonymous and confidential. We will send you a transcript if you wish in order to comment on the interview at a later stage.

#### RECORD:

Gender

Age

Practice identifier

Assigned number

#### HIGH/LOW Screening practice (defined by researcher)

Date of interview

Name of interviewer

## QUESTIONS

### Information about the surgery, practitioner and local attitudes to sexual health of young adults

1. **Could you tell me about your surgery?** (*Factual background data to check range of practices*)  
Probe:
  - What are the characteristics of this surgery (e.g. training R&D)
  - What ethnic groups do you serve?
2. **Can you tell me about any sexual health training you have undertaken?** (*Factual background data to check range of staff, capability, social norms*)  
Prompt:
  - Sexually Transmitted Infection Foundation (STIF) course
  - Diploma of the Faculty of Sexual and Reproductive Healthcare (DFSRH)
  - Online modules from BMJ, RCGP
3. **Are you aware of anyone else at the surgery having undertaken this type of training?** (*capability, social norms*)
4. **What are your views on the importance of young adults' sexual health (those aged 15-24 yrs)?** (*personal attitudes*)  
Probe:
  - In relation to 3 C's and other priorities in the surgery (*subjective norms, behavioural controls*)
5. **What are your views on the importance of young adults' sexual health to other staff in your surgery?**  
Probe:
  - In relation to 3C's and other priorities in the surgery (*subjective norms, behavioural controls*)

### Commissioning of sexual health services

6. **What influence does local commissioning have on the sexual health services provided by your surgery?** (*subjective norms, behavioural controls*)
7. **How do you decide in your surgery whether to undertake chlamydia screening or other public health initiatives?** (*subjective norms, behavioural controls*)  
Probe:
  - What would increase the importance of chlamydia screening in this surgery to make it a priority to take forward? (*Personal attitudes*)

### Delivery of sexual health services within the surgery

#### Chlamydia screening

8. **Do you feel confident to offer a chlamydia screen to all 15-24 year olds?** (*Capability within behavioural controls*)  
Probe:
  - Why yes or no?
  - Males/females?
  - Did you think the posters, cards and film clip are useful?**Go through the contents of the intervention** (*subjective norms, behavioural controls*)
  - What would be useful and how it is different to other materials they use already? (*subjective norms, behavioural controls*)

- How else could we increase your confidence? (*influencing Confidence within behavioural controls*)
- What has been done in your surgery to encourage uptake of chlamydia screening? (*influencing Confidence within behavioural controls, personal attitude and subjective norms*)
- Support from NCSP?
- Feedback of results?
- What else do you think is needed to encourage screening in your surgery?
- Check computer prompts and how they are used, templates, posters and leaflets, LES

## **Contraception**

9. How do you think young people feel about this surgery offering contraceptive advice and supplies? (*subjective norms, behavioural controls*)
10. How confident do you feel to offer contraceptive advice to young adults? (*behavioural controls*)  
Probe:
  - Males/female
  - Younger/older age group
  - Contraceptive type
11. How do you think this surgery as a whole feel about offering contraception to young people? (*subjective norms*)  
Probe:
  - Explore different staff members
12. How would you feel about offering contraceptive advice in a consultation that was not related to sexual health? (*personal attitudes and influencing behavioural controls*)  
Probe:
  - How do you think this should be done?
  - Who do you think you should ask?
  - How do you think it could be raised in a consultation?
  - How confident do you feel to offer a LARC as part of your advice?
  - Barriers - training, not requested, fitting it

## **Delivery of sexual health services within the surgery *continued***

## **Condoms**

13. What sources of free condoms for young people are available in this area? (*facts and subjective norms*)  
Prompt:
  - From this surgery?
  - From other healthcare providers?
  - From other sources?
  - Check whether offer C-card) (*behavioural controls*)
  - Do young people ask?
14. How does your surgery signpost to these sources of free condoms?  
- (*subjective norms, behavioural controls*)
15. How do you feel about offering or signposting free condoms to all young adults? (*personal attitudes, subjective norms and behavioural controls*)  
Probe:
  - Males/female
  - Younger/older age group
  - Actually giving out during consultation

- Ask about advice about avoiding STIs – condom advice, advice about other STIs for example HIV

**16. How confident do you feel to offer this?**

- *(behavioural controls)*

**17. How would other staff feel? *(subjective norms and behavioural controls)***

Prompt:

- How could this happen in your surgery? *(subjective norms and behavioural controls)*

**Delivery of sexual health services within the surgery *continued***

**Combined sexual health offer**

**18. What are your views on routinely making a combined basic sexual health offer consisting of a chlamydia test, contraception check and signposting to free condoms (the 3 Cs) to all young adults attending your surgery? *(personal attitudes & behavioural controls)***

Prompt:

- Which consultations?
- Potential barriers?
- Males/females?

**19. What do you think is the best way of phrasing this combined offer? *(personal attitudes & influencing skills within behavioural controls)***

**20. Do you think other staff in the surgery would support offering a routine combined basic sexual health offer of the 3Cs to all young adults attending your surgery? - *(subjective norms, & behavioural controls)***

Probe:

- Which consultations?
- Potential barriers

**21. What are your views about the surgery offering a small card (show card from study) to all young adults attending the surgery in order to normalise this offer of chlamydia screening, contraception check and condom provision? - *(personal attitudes & behavioural controls)***

Prompt:

- About privacy
- Receptionists offering the card
- Would they then ask staff for a kit or make an appointment?

**22. Do you think combining the offer of chlamydia screen with condoms and contraception could reduce chlamydia screening in the surgery?**

**Delivery of sexual health services within the surgery *continued***

**HIV testing**

**23. Are you aware of the UK HIV testing guidelines that exist for GP surgeries? *(Knowledge, and skills within behavioural controls)***

Prompt:

- NICE, BHIVA, Time to Test? Show summary of testing guidelines if necessary

**24. On what basis should GP surgeries offer and recommend a test to their patients? *(personal attitudes and subjective norms)***

Probe:

- Prevalence?
- At risk?
- Indicator conditions?
- Belief regarding acceptability to patients?

**25. Are you aware of the HIV prevalence rate for this PCT area?** (*background facts, behavioural controls, personal attitudes*)

Prompt:

- High/low?
- What is it per 1000?
- How did you get the information? (PCT, training course, HPA, other)
- (behavioural controls)

**26. What is your opinion about offering a test to all new patient registrants at your surgery?** - (*personal attitudes and behavioural controls*)

Probe:

- Testing all patients age 16-59, then all patients age 60+ - what age should be the cut off?
- How feasible is it to offer tests to new registrants/all patients?

**27. How familiar are you with indicator conditions for HIV and primary HIV infection symptoms?** (*Knowledge, skills within behavioural controls*)

Probe:

- Which would prompt them to test
- Specifically asking about TB, recurrent herpes zoster, Kaposi's sarcoma and mononucleosis symptoms
- How they would feel about a routine offer for named illnesses/syndromes?

**28. How do you feel about using history taking to identify patients who may be at risk of HIV?** (*subjective norms and personal attitude*)

Probe:

- MSM, sexual orientation and ethnic origin of partner

**29. When did you last carry out an HIV test for a patient?** (*personal attitudes, knowledge skills within behavioural controls*)

Probe:

- On what basis did you offer the test?
- What was the result?
- What did you do then?

**30. Which HIV test do you use?** (*knowledge, skills within behavioural controls*)

Probe:

- Rapid/non rapid – saliva/serum/venepuncture.
- If not using, ask how would feel about moving to POCT testing, and giving results immediately? (*personal attitudes*)

## **Delivery of sexual health services within the surgery *continued***

### **HIV testing *continued***

**31. What do you think other staff here feel about undertaking HIV testing in the surgery?** (*subjective norms, & behavioural controls*)

Probe:

- On what basis testing occurs
- Which staff are testing?
- Is testing discussed?

**32. Do you have a clinical pathway in place for patients that have a positive test result?** (*Knowledge, confidence skills within behavioural controls, and subjective norms*)

Prompt:

- Are you confident about this pathway?
- Do you know which service to refer to?
- Are you aware of BHIVA standards for onward referral to HIV services?

**33. What sort of additional training would you and other staff at this surgery need to undertake HIV testing with patients at this surgery?** (*Knowledge, confidence skills within behavioural controls, behavioural controls*)

Prompt:

- Indicator conditions
- History taking
- Guidelines/risk groups
- How to offer test including a script
- Evidence on patient acceptability
- Treatment for HIV
- Local HIV care

### **Training**

**34. How would you ideally access training in this area?** (*personal attitudes, subjective norms, & behavioural controls*)

*Probe:*

- By a surgery visit from a sexual health trainer
- A joint workshop with two other local surgeries
- An area workshop by local commissioners, or an existing course like STIF or DFSRH?
- Different for 3Cs and HIV?
- Ideal versus cost for commissioners and if local training of groups of surgeries takes place

**Summarise key points of the discussion**
