# Supplementary material
Source: HighWire-hosted journal article supplement (https://bmjopen.bmj.com/content/7/9/e017528)
Supplement: inline-supplementary-material-3 [file inline-supplementary-material-3.pdf]

Supplementary 3. Recruitment  
of GP staff for 3Cs & HIV pre  
intervention interviews-  
ENGLAND

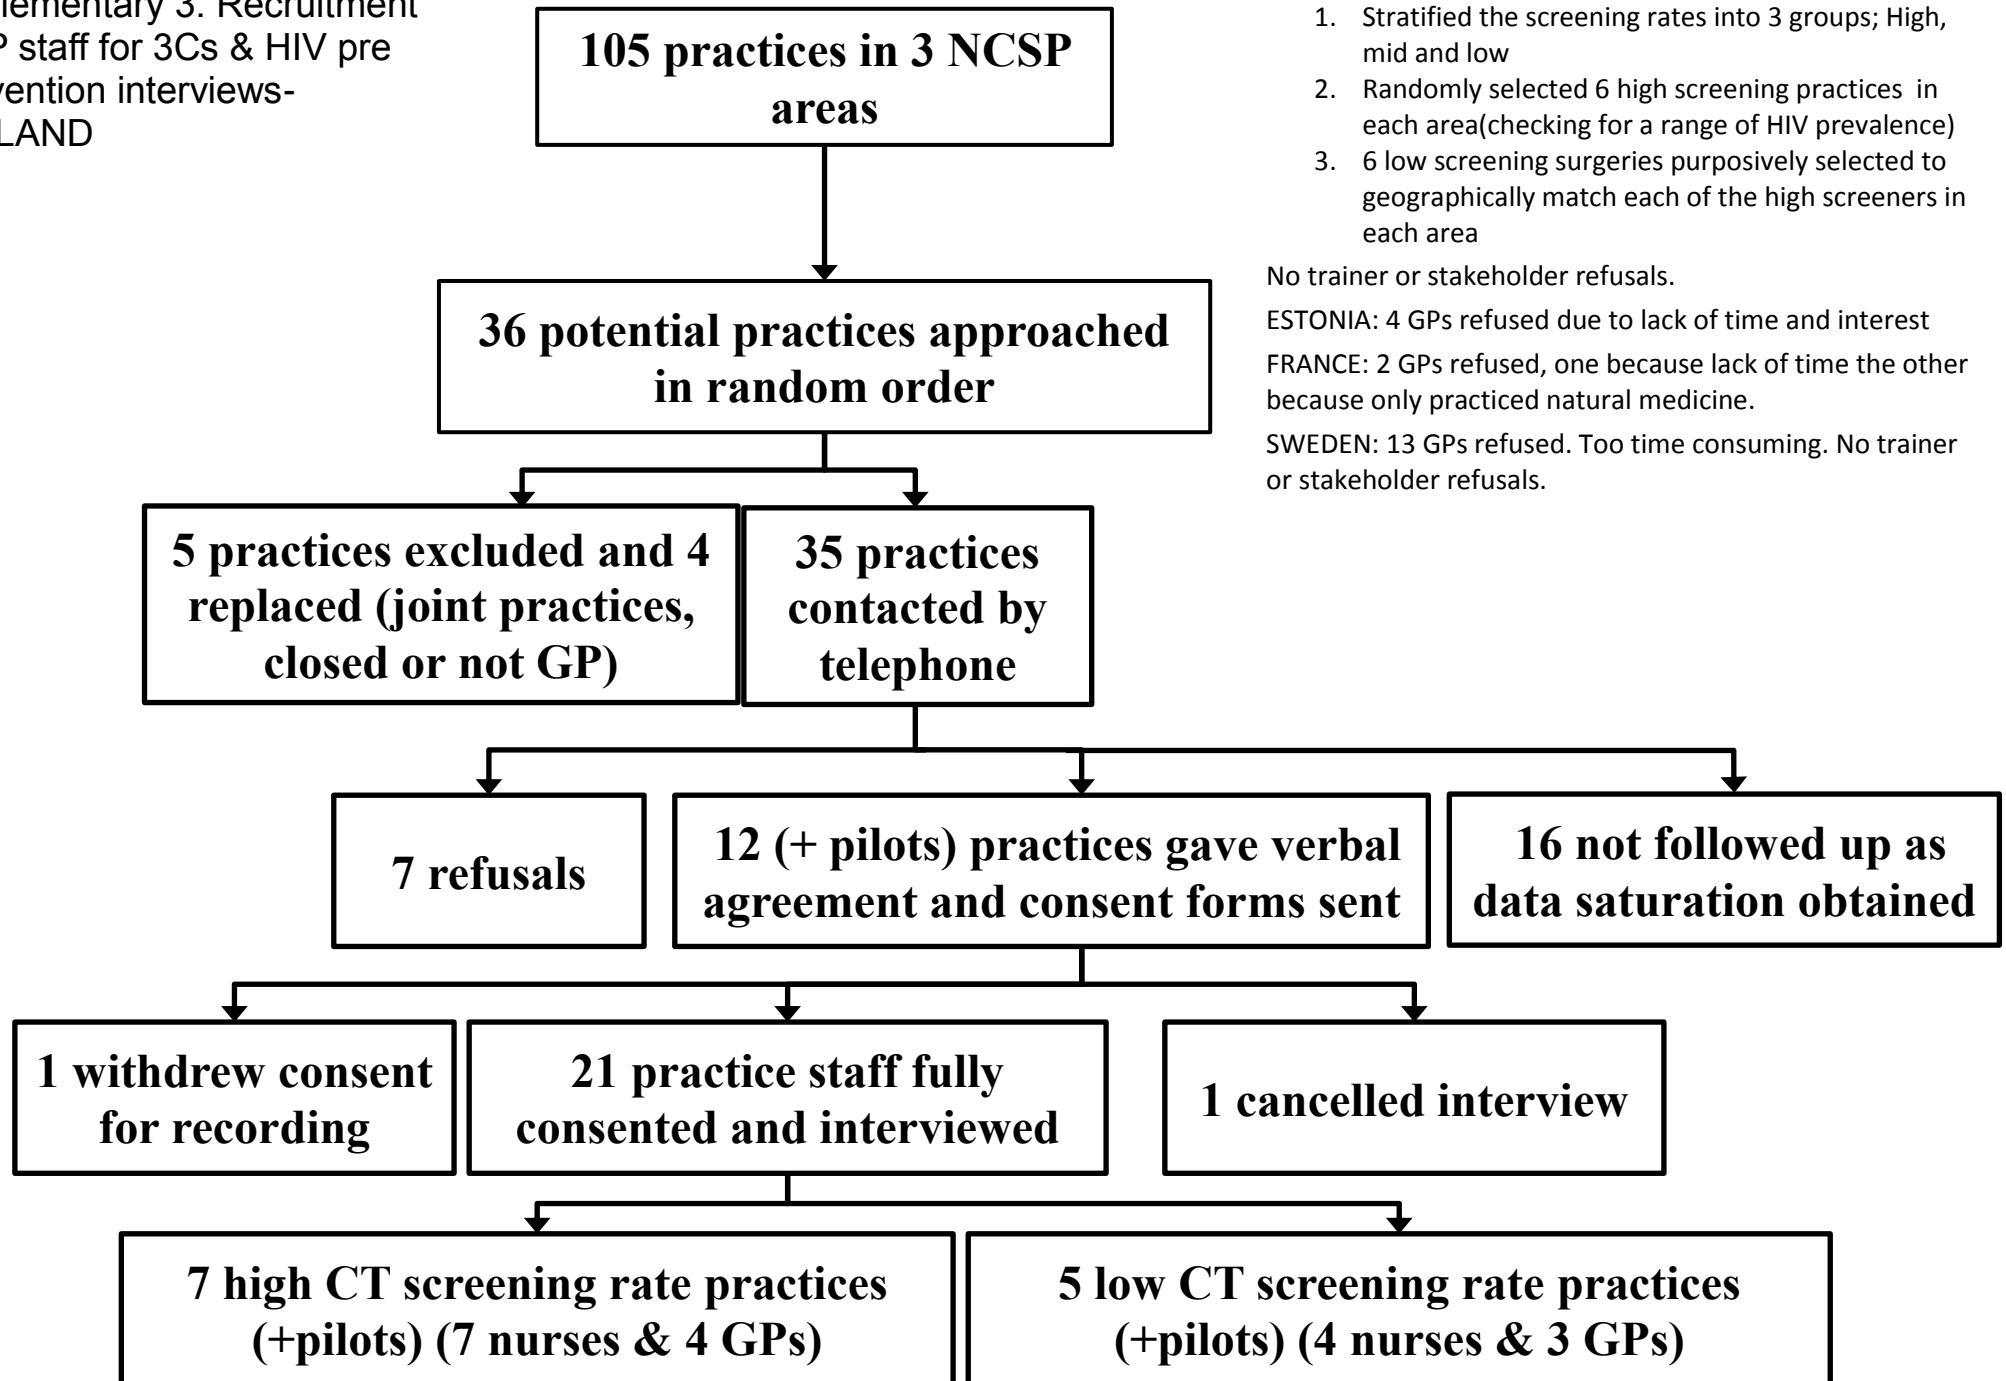

ENGLAND:

1. Stratified the screening rates into 3 groups; High, mid and low
2. Randomly selected 6 high screening practices in each area (checking for a range of HIV prevalence)
3. 6 low screening surgeries purposively selected to geographically match each of the high screeners in each area

No trainer or stakeholder refusals.

ESTONIA: 4 GPs refused due to lack of time and interest

FRANCE: 2 GPs refused, one because lack of time the other because only practiced natural medicine.

SWEDEN: 13 GPs refused. Too time consuming. No trainer or stakeholder refusals.
